# Supplementary material
Source: PubMed Central journal article supplement (PMC3037646)

Supplementary Figure S1. 5'- PSB loop sequence motif localized in the large cleft conserved in the glycosaminoglycan sulfotransferase with known structures (NST, PDB 1NST, light blue; 2-O-ST, PDB 3F5F, yellow; 3-O-ST, PDB 1T8T, pink). The Lys/PAPS conservative substitution is shown as multicoloured, and the docked peptide fitting to NST is shown in gray. Figure generated with MatchMaker toll from UCSF Chimera (52).

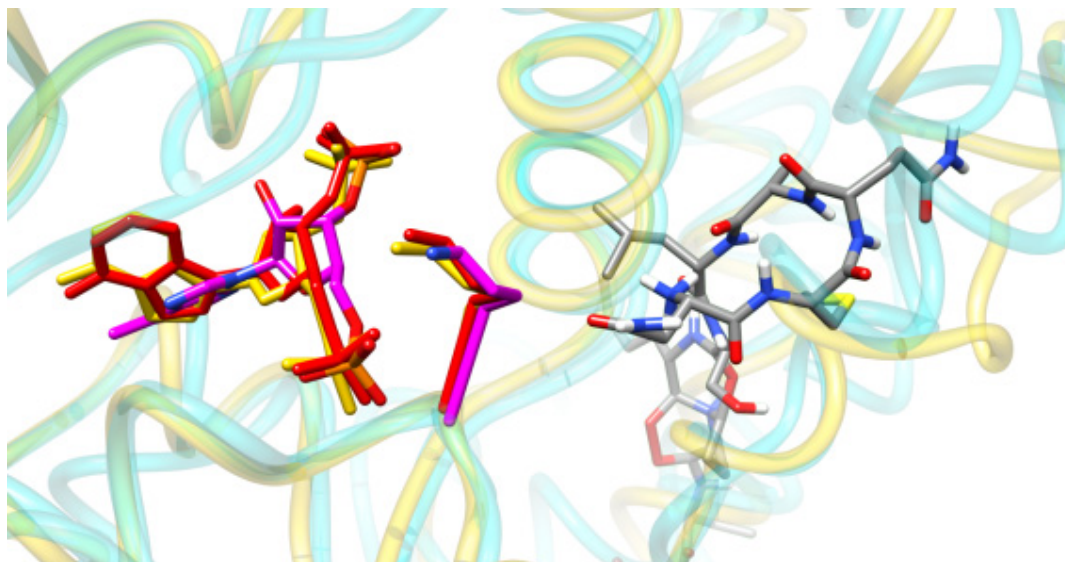

Supplement: supp_M110.100719_jbc.M110.100719-1.pdf [file supp_M110.100719_jbc.M110.100719-1.pdf]
