# Supplementary material
Source: PubMed Central journal article supplement (PMC3037646)
Supplement: supp_M110.100719_jbc.M110.100719-2.pdf [file supp_M110.100719_jbc.M110.100719-2.pdf]

**SUPPLEMENTARY DATA**

Supplementary Table S1. Comparison of Factors Affecting the binding of N-sulfotransferase inhibitory peptides to other sulfotransferases

| <b>Sulfotransferase</b> | <b>PDB code</b> | <b>Number of residues</b> | <b>Total volume (Å<sup>3</sup>)</b> | <b>Pocket volume (Å<sup>3</sup>)</b> | <b>Solvent accessibility for catalytic site LYS residues</b> | <b>Relative solvent accessibility for PAPS*</b> | <b>NMQALSMPVT theoretical Ki</b> |
|-------------------------|-----------------|---------------------------|-------------------------------------|--------------------------------------|--------------------------------------------------------------|-------------------------------------------------|----------------------------------|
| NDST                    | 1NS<br>T        | 282                       | 27373                               | 712                                  | K614: 4.05;<br>K833: 33.83                                   | 0.07                                            | 0.82 μM                          |
| 3OST                    | 1T8T            | 268                       | 52874                               | 697                                  | K162: 3.24;<br>K366: 100.12                                  | 0.03                                            | infinite                         |
| 2OST                    | 3F5F            | 656                       | 62187                               | 689                                  | K1083: 7.71;<br>K1293: 85.34                                 | 0.04                                            | infinite                         |

\*Relative solvent accessibility is the ratio of solvent-accessible surface area for the ligand bound to the protein against that for an isolated ligand, calculated by NACCESS.
